# Supplementary material for: Evaluating Yangtze River Delta Urban Agglomeration flood risk using hybrid method of AutoML and AHP
Source: Copernicus journal article supplement (doi:10.5194/nhess-2024-144), 2024-09-16

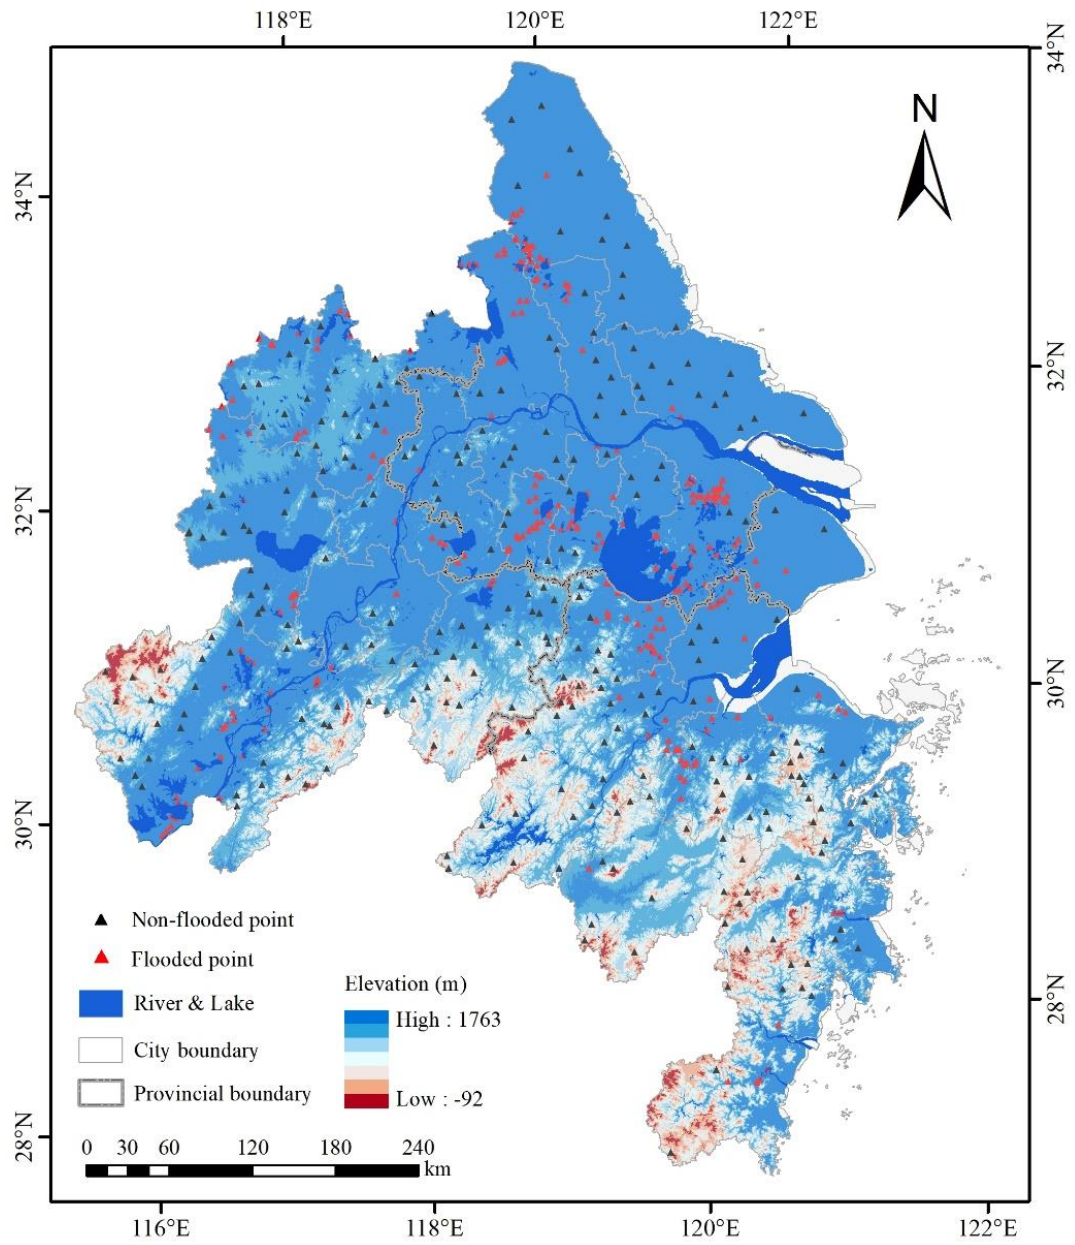

Supplement: Supplementary file [file nhess-2024-144-AC1-supplement.pdf]
