# Supplementary material for: Evaluating Yangtze River Delta Urban Agglomeration flood risk using hybrid method of AutoML and AHP
Source: Copernicus journal article supplement (doi:10.5194/nhess-2024-144), 2024-09-16
Supplement: Supplementary file [file nhess-2024-144-AC2-supplement.pdf]

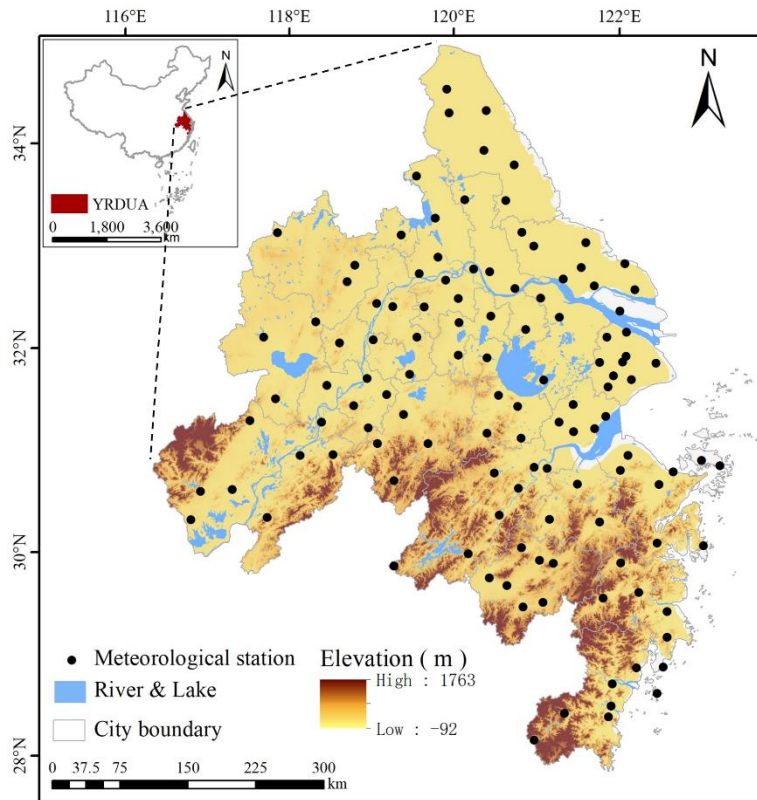

**Figure 2: The schematic map of the YRDUA.**

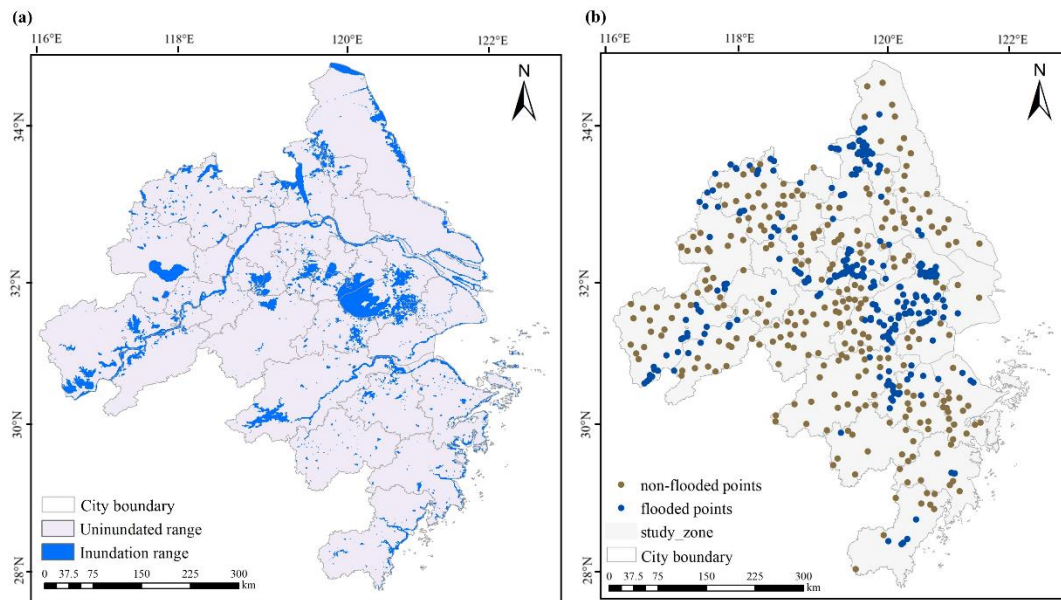

**Figure 3: (a) Flood inundation map of the study area. (b) Spatial Distribution of Flooded and Non-Flooded Points in the YRDUA.**
